# Supplementary material for: Predicting cytotoxicity of PAMAM dendrimers using molecular descriptors
Source: publisher site journal article supplement (doi:10.3762/bjnano.6.192), 2015-09-11
Supplement: Additional file 1 [file 2190-4286-6-192-S1.pdf]

**Supporting Information**

**for**

**Predicting cytotoxicity of PAMAM dendrimers using  
molecular descriptors**

David E. Jones<sup>1</sup>, Hamidreza Ghandehari<sup>2,3,4</sup>, and Julio C. Facelli<sup>1,4,\*</sup>

Address: <sup>1</sup>Department of Biomedical Informatics, University of Utah, Salt Lake City, UT 84112, USA, <sup>2</sup>Department of Bioengineering, University of Utah, Salt Lake City, UT 84112, USA, <sup>3</sup>Department of Pharmaceutics and Pharmaceutical Chemistry, University of Utah, Salt Lake City, UT 84112, USA, and <sup>4</sup>Utah Center for Nanomedicine, Nano Institute of Utah, University of Utah, Salt Lake City, UT 84112, USA

Email: Julio C. Facelli - [julio.facelli@utah.edu](mailto:julio.facelli@utah.edu)

\* Corresponding author

## Supporting Tables

**Table S1:** Listing of the molecular descriptors and their definitions selected from MarvinSketch [4].

| Molecular Descriptor     | Units          | Definition                                                                                                                                                                                                                                                          |
|--------------------------|----------------|---------------------------------------------------------------------------------------------------------------------------------------------------------------------------------------------------------------------------------------------------------------------|
| Molecular Weight         | Da             | Average molecular mass calculated from the standard atomic weights [1].                                                                                                                                                                                             |
| Exact Mass               | Da             | Monoisotopic mass calculated from the weights of the most abundant natural isotopes of the elements [2].                                                                                                                                                            |
| Atom Count               |                | Number of all atoms in the molecule.                                                                                                                                                                                                                                |
| pI                       |                | Net charge of an ionizable molecule is zero at a certain pH. This pH is called the isoelectric point, also referred to as pI.                                                                                                                                       |
| logP                     |                | The octanol/water partition coefficient, which is used in quantitative structure activity relationships (QSAR) analysis and rational drug design as a measure of molecular hydrophobicity [3].                                                                      |
| logD                     |                | The octanol-water distribution coefficient, logD represents the compounds at any pH value.                                                                                                                                                                          |
| Molecular Polarizability | Å <sup>3</sup> | The electric field generated by partial charges of a molecule spread through intermolecular cavities and the solvent. The induced partial charge (induced dipole) has a tendency to diminish the external electric field. This phenomenon is called polarizability. |
| Aliphatic Atom Count     |                | Number of atoms in the molecule having no aromatic bond (excluding hydrogens).                                                                                                                                                                                      |
| Aliphatic Bond Count     |                | Number of non-aromatic bonds in the molecule (excluding bonds of hydrogen atoms).                                                                                                                                                                                   |
| Aromatic Atom Count      |                | Number of atoms in the molecule having aromatic bonds.                                                                                                                                                                                                              |
| Aromatic Bond Count      |                | Number of aromatic bonds in the molecule.                                                                                                                                                                                                                           |
| Asymmetric Atom Count    |                | The number of asymmetric atoms (having four different ligands).                                                                                                                                                                                                     |
| Bond Count               |                | Number of bonds in the molecule including bonds of hydrogen atoms.                                                                                                                                                                                                  |
| Chain Atom Count         |                | Number of chain atoms (non-ring atoms excluding hydrogens).                                                                                                                                                                                                         |
| Chain Bond Count         |                | Number of chain bonds (non-ring bonds excluding bonds of hydrogen atoms).                                                                                                                                                                                           |
| Chiral Center Count      |                | The number of tetrahedral stereogenic centers. This function identifies two chiral centers in 1,4-dimethylcyclohexane,                                                                                                                                              |

|                            |  |                                                                                                                                                                                                                                                                                                                                                                                                              |
|----------------------------|--|--------------------------------------------------------------------------------------------------------------------------------------------------------------------------------------------------------------------------------------------------------------------------------------------------------------------------------------------------------------------------------------------------------------|
|                            |  | which does not contain asymmetric atoms.                                                                                                                                                                                                                                                                                                                                                                     |
| Ring Atom Count            |  | Number of ring atoms.                                                                                                                                                                                                                                                                                                                                                                                        |
| Ring Bond Count            |  | Number of ring bonds.                                                                                                                                                                                                                                                                                                                                                                                        |
| Rotatable Bond Count       |  | Number of rotatable bonds in the molecule. Unsaturated bonds, and single bonds connected to hydrogens or terminal atoms, single bonds of amides, sulphonamides and those connecting two hindered aromatic rings (having at least three ortho substituents) are considered non-rotatable.                                                                                                                     |
| Stereo Double Bond Count   |  | Number of double bonds with defined stereochemistry.                                                                                                                                                                                                                                                                                                                                                         |
| Aliphatic Ring Count       |  | Number of those rings in the molecule that have non-aromatic bonds (SSSR based).                                                                                                                                                                                                                                                                                                                             |
| Aromatic Ring Count        |  | Number of aromatic rings in the molecule. This number is calculated from the smallest set of smallest aromatic rings (SSSAR), which might contain rings which are not part of the standard SSSR ring set. As a consequence, the sum of the aliphatic ring count and the aromatic ring count can sometimes be greater than the ring count value. The difference is the signal of a macroaromatic ring system. |
| Carbo Ring Count           |  | Number of rings containing only carbon atoms.                                                                                                                                                                                                                                                                                                                                                                |
| Carboaliphatic Ring Count  |  | Number of aliphatic rings containing only carbon atoms.                                                                                                                                                                                                                                                                                                                                                      |
| Carboaromatic Ring Count   |  | Number of aromatic rings containing only carbon atoms (SSSAR based).                                                                                                                                                                                                                                                                                                                                         |
| Fused Aliphatic Ring Count |  | Number of aliphatic rings having common bonds with other rings.                                                                                                                                                                                                                                                                                                                                              |
| Fused Aromatic Ring Count  |  | Number of aromatic rings having common bonds with other rings.                                                                                                                                                                                                                                                                                                                                               |
| Fused Ring Count           |  | Number of fused rings in the molecule (having common bonds).                                                                                                                                                                                                                                                                                                                                                 |
| Hetero Ring Count          |  | Number of rings containing hetero atom(s).                                                                                                                                                                                                                                                                                                                                                                   |
| Heteroaliphatic Ring Count |  | Number of aliphatic heterocycles in the molecule.                                                                                                                                                                                                                                                                                                                                                            |
| Heteroaromatic Ring Count  |  | Number of aromatic heterocycles in the molecule.                                                                                                                                                                                                                                                                                                                                                             |
| Largest Ring Size          |  | Size of the largest ring in the molecule.                                                                                                                                                                                                                                                                                                                                                                    |
| Largest Ring System Size   |  | Number of rings in the largest ring system.                                                                                                                                                                                                                                                                                                                                                                  |
| Ring Count                 |  | Number of rings in the molecule. This calculation is based on SSSR (Smallest Set of Smallest Rings).                                                                                                                                                                                                                                                                                                         |
| Ring System Count          |  | Number of disjunct ring systems.                                                                                                                                                                                                                                                                                                                                                                             |
| Smallest Ring Size         |  | Size of the smallest ring in the molecule.                                                                                                                                                                                                                                                                                                                                                                   |

|                           |                                   |                                                                                                                                                                                                                                   |
|---------------------------|-----------------------------------|-----------------------------------------------------------------------------------------------------------------------------------------------------------------------------------------------------------------------------------|
| Smallest Ring System Size |                                   | Number of rings in the smallest ring system.                                                                                                                                                                                      |
| Platt Index               |                                   | Sum of the edge degrees of a molecular graph.                                                                                                                                                                                     |
| Randic Index              |                                   | Harmonic sum of the geometric means of the node degrees for each edge.                                                                                                                                                            |
| Harary Index              |                                   | Half-sum of the off-diagonal elements of the reciprocal molecular distance matrix of the molecule.                                                                                                                                |
| Hyper Wiener Index        |                                   | A variant of the Wiener index.                                                                                                                                                                                                    |
| Szeged Index              |                                   | The Szeged index extends the Wiener index for cyclic graphs by counting the number of atoms on both sides of each bond (those atoms only which are nearer to the given side of the bond than to the other), and sum these counts. |
| Wiener Index              |                                   | The average topological atom distance (half of the sum of all atom distances) in the molecule.                                                                                                                                    |
| Wiener Polarity           |                                   | The number of 3 bond length distances in the molecule.                                                                                                                                                                            |
| Cyclomatic Number         |                                   | The smallest number of bonds which must be removed so that no circuit remains. Also known as circuit rank.                                                                                                                        |
| Fragment Count            |                                   | Number of fragments in the sketch.                                                                                                                                                                                                |
| H-Bond Donor Count        |                                   | Hydrogen Bond Donor calculates atomic hydrogen bond donor inclination.                                                                                                                                                            |
| H-Bond Donor Sites        |                                   | Hydrogen Bond Donor calculates atomic hydrogen bond donor inclination.                                                                                                                                                            |
| H-Bond Acceptor Count     |                                   | Hydrogen Bond Acceptor calculates atomic hydrogen bond acceptor inclination.                                                                                                                                                      |
| H-Bond Acceptor Sites     |                                   | Hydrogen Bond Acceptor calculates atomic hydrogen bond acceptor inclination.                                                                                                                                                      |
| Refractivity              | $10^6[\text{m}^3\text{mol}^{-1}]$ | Molar refractivity is strongly related to the volume of the molecules and to London dispersive forces that has important effect in drug-receptor interaction.                                                                     |

**Table S2:** Results from the leave-one-out cross-validation listed by classifier of the first analysis including all molecular descriptors.

| <b>Classifier</b>                | <b>Precision</b> | <b>Recall</b> | <b>F-Measure</b> | <b>Mean Absolute Error</b> | <b>Accuracy</b> |
|----------------------------------|------------------|---------------|------------------|----------------------------|-----------------|
| Naïve Bayes                      | 0.738            | 0.738         | 0.725            | 0.2972                     | 73.8%           |
| SMO                              | 0.780            | 0.767         | 0.751            | 0.2330                     | 76.7%           |
| J48                              | 0.748            | 0.718         | 0.722            | 0.3180                     | 71.8%           |
| Bagging                          | 0.800            | 0.777         | 0.780            | 0.3241                     | 77.7%           |
| Classification<br>via Regression | 0.780            | 0.767         | 0.751            | 0.2956                     | 76.7%           |
| Filtered<br>Classifier           | 0.748            | 0.718         | 0.722            | 0.3180                     | 71.8%           |
| LWL                              | 0.834            | 0.777         | 0.778            | 0.2971                     | 77.7%           |
| Decision Table                   | 0.698            | 0.680         | 0.683            | 0.3746                     | 68.0%           |
| DTNB                             | 0.755            | 0.728         | 0.732            | 0.3145                     | 72.8%           |
| NBTree                           | 0.834            | 0.777         | 0.778            | 0.2520                     | 77.7%           |
| Random Forest                    | 0.750            | 0.738         | 0.741            | 0.2874                     | 73.8%           |

**Table S3:** Results from the leave-one-out cross-validation listed by classifier of the second analysis including the automatically feature selected molecular descriptors.

| <b>Classifier</b>             | <b>Precision</b> | <b>Recall</b> | <b>F-Measure</b> | <b>Mean Absolute Error</b> | <b>Accuracy</b> |
|-------------------------------|------------------|---------------|------------------|----------------------------|-----------------|
| Naïve Bayes                   | 0.738            | 0.738         | 0.725            | 0.2972                     | 73.8%           |
| SMO                           | 0.780            | 0.767         | 0.751            | 0.2330                     | 76.7%           |
| J48                           | 0.748            | 0.718         | 0.722            | 0.3180                     | 71.8%           |
| Bagging                       | 0.755            | 0.728         | 0.732            | 0.3241                     | 72.8%           |
| Classification via Regression | 0.780            | 0.767         | 0.751            | 0.2956                     | 76.7%           |
| Filtered Classifier           | 0.748            | 0.718         | 0.722            | 0.3180                     | 71.8%           |
| LWL                           | 0.834            | 0.777         | 0.778            | 0.2971                     | 77.7%           |
| Decision Table                | 0.650            | 0.641         | 0.644            | 0.3736                     | 64.1%           |
| DTNB                          | 0.755            | 0.728         | 0.732            | 0.3145                     | 72.8%           |
| NBTree                        | 0.834            | 0.777         | 0.778            | 0.2520                     | 77.7%           |
| Random Forest                 | 0.750            | 0.738         | 0.741            | 0.2879                     | 73.8%           |

**Table S4:** Results from the leave-one-out cross-validation listed by classifier for the third analysis including the molecular descriptors selected by experts.

| <b>Classifier</b>             | <b>Precision</b> | <b>Recall</b> | <b>F-Measure</b> | <b>Mean Absolute Error</b> | <b>Accuracy</b> |
|-------------------------------|------------------|---------------|------------------|----------------------------|-----------------|
| Naïve Bayes                   | 0.796            | 0.786         | 0.789            | 0.2550                     | 78.6%           |
| SMO                           | 0.738            | 0.738         | 0.725            | 0.2621                     | 73.8%           |
| J48                           | 0.748            | 0.718         | 0.722            | 0.3180                     | 71.8%           |
| Bagging                       | 0.813            | 0.786         | 0.789            | 0.3208                     | 78.6%           |
| Classification via Regression | 0.796            | 0.786         | 0.789            | 0.2954                     | 78.6%           |
| Filtered Classifier           | 0.834            | 0.777         | 0.778            | 0.3051                     | 77.7%           |
| LWL                           | 0.834            | 0.777         | 0.778            | 0.3030                     | 77.7%           |
| Decision Table                | 0.604            | 0.602         | 0.603            | 0.3867                     | 60.2%           |
| DTNB                          | 0.604            | 0.602         | 0.603            | 0.3829                     | 60.2%           |
| NBTree                        | 0.834            | 0.777         | 0.778            | 0.3271                     | 77.7%           |
| Random Forest                 | 0.750            | 0.738         | 0.741            | 0.2865                     | 73.8%           |

**Table S5:** Schema describing different properties of the various generations of PAMAM dendrimers [5-12].

| Generation             | Generation Classification | Surface Group    | No. Surface Group | Molecular Weight (Da) | Diameter (nm) |
|------------------------|---------------------------|------------------|-------------------|-----------------------|---------------|
| G0                     | Full                      | -NH <sub>2</sub> | 4                 | 517                   | 1.5           |
| G1                     | Full                      | -NH <sub>2</sub> | 8                 | 1430                  | 2.2           |
| G1.5                   | Half                      | -COOH            | 16                | 2935                  | 2.2           |
| G2 (-NH <sub>2</sub> ) | Full                      | -NH <sub>2</sub> | 16                | 3256                  | 2.9           |
| G2 (-OH)               | Full                      | -OH              | 16                | 3272                  | 2.9           |
| G2.5                   | Half                      | -COOH            | 32                | 6267                  | 3.56          |
| G3                     | Full                      | -NH <sub>2</sub> | 32                | 6909                  | 3.6           |
| G3.5                   | Half                      | -COOH            | 64                | 12931                 | 3.8           |
| G4                     | Full                      | -NH <sub>2</sub> | 64                | 14215                 | 4.5           |
| G4.5                   | Half                      | -COOH            | 128               | 26258                 | 4.7           |



**Table S6:** Table listing all of the acronyms/abbreviations and their unabbreviated forms.

| <b>Acronym/Abbreviation</b> | <b>Unabbreviated Form</b>        |
|-----------------------------|----------------------------------|
| NLP                         | Natural language processing      |
| PAMAM                       | Poly(amido amine)                |
| ChiSquaredAttributeEval     | Chi squared attribute evaluation |
| pI                          | Isoelectric point                |
| LWL                         | Locally weighted learning        |
| NBTree                      | Naïve Bayes tree                 |
| SMO                         | Sequential minimal optimization  |
| DTNB                        | Decision table/Naïve Bayes       |

**Table S7:** J48 classification accuracy and RMS when using the features selected using all possible WEKA recommended pairs of Attribute Evaluator and Search Method. The selected features are given in the third column.

| Attribute Evaluator     | Search Method    | Selected Attributes                                                                                                                                                                                                                                                                                                                                                                                                 | J48 Accuracy | J48 RMS Error |
|-------------------------|------------------|---------------------------------------------------------------------------------------------------------------------------------------------------------------------------------------------------------------------------------------------------------------------------------------------------------------------------------------------------------------------------------------------------------------------|--------------|---------------|
| CfsSubsetEval           | BestFirst        | pI, logP                                                                                                                                                                                                                                                                                                                                                                                                            | 74.8         | 0.4163        |
| CfsSubsetEval           | ExhaustiveSearch | DID NOT RUN DUE TO THE LARGE SIZE OF FEATUE SET                                                                                                                                                                                                                                                                                                                                                                     |              |               |
| CfsSubsetEval           | GreedyStepwise   | pI, logP                                                                                                                                                                                                                                                                                                                                                                                                            | 74.8         | 0.4163        |
| ChiSquaredAttributeEval | Ranker           | H-Bond_Acceptor_Sites, pI, logP, Harary_Index, Refractivity, Bond_Count, Molecular_Polarizability, Rotatable_Bond_Count, Atom_Count, logD, Aliphatic_Bond_Count, Chain_Bond_Count, Chain_Atom_Count, Aliphatic_Atom_Count, Exact_Mass, Molecular_Weight, Wiener_Index, Randic_Index, Szedged_Index, Wiener_Polarity, Platt_Index, H-Bond_Donor_Count, Hyper_Wiener_Index, H-Bond_Donor_Sites, H-Bond_Acceptor_Count | 74.8         | 0.401         |
| ClassifierSubsetEval    | GreedyStepwise   | NO ATTRIBUTES SELECTED                                                                                                                                                                                                                                                                                                                                                                                              |              |               |
| ConsistencySubsetEval   | GreedyStepwise   | pI, logD                                                                                                                                                                                                                                                                                                                                                                                                            | 74.8         | 0.4163        |

|                            |                |                                                                                                                                                                                                                                                                                                                                                                                                                                                                                 |      |        |
|----------------------------|----------------|---------------------------------------------------------------------------------------------------------------------------------------------------------------------------------------------------------------------------------------------------------------------------------------------------------------------------------------------------------------------------------------------------------------------------------------------------------------------------------|------|--------|
| CostSensitiveAttributeEval | Ranker         | NO ATTRIBUTES<br>SELECTED                                                                                                                                                                                                                                                                                                                                                                                                                                                       |      |        |
| CostSensitiveSubsetEval    | GreedyStepwise | NO ATTRIBUTES<br>SELECTED                                                                                                                                                                                                                                                                                                                                                                                                                                                       |      |        |
| FilteredAttributeEval      | Ranker         | H-Bond_Acceptor_Sites,<br>Harary_Index, logP, pI,<br>Bond_Count, Refractivity,<br>Molecular_Polarizability,<br>Rotatable_Bond_Count,<br>Atom_Count, logD, H-<br>Bond_Donor_Sites,<br>Aliphatic_Atom_Count,<br>Chain_Bond_Count,<br>Aliphatic_Bond_Count,<br>Exact_Mass,<br>Chain_Atom_Count,<br>Molecular_Weight,<br>Szedged_Index,<br>Wiener_Polarity,<br>Randic_Index, Wiener_Index,<br>Platt_Index, H-<br>Bond_Donor_Count,<br>Hyper_Wiener_Index, H-<br>Bond_Acceptor_Count | 74.8 | 0.401  |
| FilteredSubsetEval         | GreedyStepwise | pI, logP                                                                                                                                                                                                                                                                                                                                                                                                                                                                        | 74.8 | 0.4163 |
| GainRatioAttributeEval     | Ranker         | pI, Hyper_Wiener_Index,<br>logP, Platt_Index,<br>Aliphatic_Atom_Count,<br>Szedged_Index,<br>Aliphatic_Bond_Count,<br>Chain_Atom_Count,<br>Randic_Index,<br>Molecular_Weight,                                                                                                                                                                                                                                                                                                    | 74.8 | 0.401  |

|                       |        |                                                                                                                                                                                                                                                                                                                                                                                                                                                                                |      |       |
|-----------------------|--------|--------------------------------------------------------------------------------------------------------------------------------------------------------------------------------------------------------------------------------------------------------------------------------------------------------------------------------------------------------------------------------------------------------------------------------------------------------------------------------|------|-------|
|                       |        | Chain_Bond_Count,<br>Wiener_Polarity, H-<br>Bond_Donor_Count,<br>Exact_Mass, Wiener_Index,<br>logD, Harary_Index,<br>Bond_Count,<br>Rotatable_Bond_Count,<br>Atom_Count,<br>Molecular_Polarizability,<br>Refractivity, H-<br>Bond_Acceptor_Sites, H-<br>Bond_Donor_Sites, H-<br>Bond_Acceptor_Count                                                                                                                                                                            |      |       |
| InfoGainAttributeEval | Ranker | H-Bond_Acceptor_Sites,<br>Harary_Index, logP, pI,<br>Bond_Count, Refractivity,<br>Molecular_Polarizability,<br>Rotatable_Bond_Count,<br>Atom_Count, logD, H-<br>Bond_Donor_Sites,<br>Aliphatic_Atom_Count,<br>Chain_Bond_Count,<br>Aliphatic_Bond_Count,<br>Exact_Mass,<br>Chain_Atom_Count,<br>Molecular_Weight,<br>Szeged_Index,<br>Wiener_Polarity,<br>Randic_Index, Wiener_Index,<br>Platt_Index, H-<br>Bond_Donor_Count,<br>Hyper_Wiener_Index, H-<br>Bond_Acceptor_Count | 74.8 | 0.401 |

|                        |        |                                                                                                                                                                                                                                                                                                                                                                                                                                                                                 |      |       |
|------------------------|--------|---------------------------------------------------------------------------------------------------------------------------------------------------------------------------------------------------------------------------------------------------------------------------------------------------------------------------------------------------------------------------------------------------------------------------------------------------------------------------------|------|-------|
| LatentSemanticAnalysis | Ranker | Molecular_Weight,<br>Exact_Mass, Atom_Count, pI,<br>logP, logD,<br>Molecular_Polarizability,<br>Aliphatic_Atom_Count,<br>Aliphatic_Bond_Count,<br>Bond_Count,<br>Chain_Atom_Count,<br>Chain_Bond_Count,<br>Rotatable_Bond_Count,<br>Platt_Index, Randic_Index,<br>Harary_Index,<br>Hyper_Wiener_Index,<br>Szeged_Index, Wiener_Index,<br>Wiener_Polarity, H-<br>Bond_Donor_Count, H-<br>Bond_Donor_Sites, H-<br>Bond_Acceptor_Count, H-<br>Bond_Acceptor_Sites,<br>Refractivity | 74.8 | 0.401 |
| OneRAttributeEval      | Ranker | Hyper_Wiener_Index, H-<br>Bond_Donor_Sites,<br>Randic_Index, Harary_Index,<br>Wiener_Index, Platt_Index,<br>Aliphatic_Bond_Count,<br>Szeged_Index,<br>Wiener_Polarity, H-<br>Bond_Donor_Count,<br>Chain_Bond_Count,<br>Aliphatic_Atom_Count,<br>Chain_Atom_Count, H-<br>Bond_Acceptor_Sites, pI,<br>logD, logP, Bond_Count,                                                                                                                                                     | 74.8 | 0.401 |

|                     |        |                                                                                                                                                                                                                                                                                                                                                                                                                                                                                                                                                                                                                                                                                                                                                                                                                  |      |       |
|---------------------|--------|------------------------------------------------------------------------------------------------------------------------------------------------------------------------------------------------------------------------------------------------------------------------------------------------------------------------------------------------------------------------------------------------------------------------------------------------------------------------------------------------------------------------------------------------------------------------------------------------------------------------------------------------------------------------------------------------------------------------------------------------------------------------------------------------------------------|------|-------|
|                     |        | Refractivity,<br>Molecular_Polarizability,<br>Atom_Count, Exact_Mass,<br>Rotatable_Bond_Count,<br>Molecular_Weight, H-<br>Bond_Acceptor_Count,<br>Aromatic_Atom_Count,<br>Fused_Aromatic_Ring_Count,<br>Largest_Ring_System_Size,<br>Aromatic_Bond_Count,<br>Ring_System_Count,<br>Ring_Count,<br>Smallest_Ring_Size,<br>Largest_Ring_Size,<br>Fragment_Count,<br>Cyclomatic_Number,<br>Smallest_Ring_System_Size,<br>Asymmetric_Atom_Count,<br>Heteroaromatic_Ring_Count,<br>Fused_Ring_Count,<br>Aliphatic_Ring_Count,<br>Carbo_Ring_Count,<br>Carboaliphatic_Ring_Count,<br>Carboaromatic_Ring_Count,<br>Aromatic_Ring_Count,<br>Stereo_Double_Bond_Count,<br>Heteroaliphatic_Ring_Count,<br>Hetero_Ring_Count,<br>Chiral_Center_Count,<br>Ring_Atom_Count,<br>Ring_Bond_Count,<br>Fused_Aliphatic_Ring_Count |      |       |
| PrincipalComponents | Ranker | Refractivity,                                                                                                                                                                                                                                                                                                                                                                                                                                                                                                                                                                                                                                                                                                                                                                                                    | 74.8 | 0.401 |

|                      |        |                                                                                                                                                                                                                                                                                                                                                                                                                                                                |      |       |
|----------------------|--------|----------------------------------------------------------------------------------------------------------------------------------------------------------------------------------------------------------------------------------------------------------------------------------------------------------------------------------------------------------------------------------------------------------------------------------------------------------------|------|-------|
|                      |        | Molecular_Polarizability,<br>Bond_Count, Atom_Count,<br>Wiener_Polarity,<br>Randic_Index,<br>Aliphatic_Bond_Count,<br>Aliphatic_Atom_Count,<br>Chain_Atom_Count,<br>Chain_Bond_Count,<br>Molecular_Weight,<br>Exact_Mass, Platt_Index, H-<br>Bond_Donor_Count,<br>Rotatable_Bond_Count,<br>Harary_Index, H-<br>Bond_Acceptor_Count, H-<br>Bond_Donor_Sites, H-<br>Bond_Acceptor_Sites, logD,<br>Szedeg_Index, Wiener_Index,<br>logP, Hyper_Wiener_Index,<br>pI |      |       |
| ReliefFAttributeEval | Ranker | pI, Hyper_Wiener_Index,<br>logP, H-Bond_Donor_Sites,<br>logD, H-Bond_Donor_Count,<br>H-Bond_Acceptor_Sites,<br>Rotatable_Bond_Count,<br>Bond_Count, Atom_Count,<br>Molecular_Polarizability,<br>Refractivity, Wiener_Polarity,<br>Randic_Index,<br>Aliphatic_Bond_Count,<br>Chain_Bond_Count,<br>Chain_Atom_Count,<br>Aliphatic_Atom_Count,<br>Molecular_Weight,                                                                                               | 74.8 | 0.401 |

|                  |        |                                                                                                                                                                                                                                                                                                                                                                                                                                                                                                                                                                                                                             |      |       |
|------------------|--------|-----------------------------------------------------------------------------------------------------------------------------------------------------------------------------------------------------------------------------------------------------------------------------------------------------------------------------------------------------------------------------------------------------------------------------------------------------------------------------------------------------------------------------------------------------------------------------------------------------------------------------|------|-------|
|                  |        | Exact_Mass, Platt_Index, Harary_Index, H-Bond_Acceptor_Count, Szeged_Index, Wiener_Index                                                                                                                                                                                                                                                                                                                                                                                                                                                                                                                                    |      |       |
| SVMAttributeEval | Ranker | Hyper_Wiener_Index, H-Bond_Donor_Sites, Randic_Index, Harary_Index, Wiener_Index, Platt_Index, Aliphatic_Bond_Count, Szeged_Index, Wiener_Polarity, H-Bond_Donor_Count, Chain_Bond_Count, Aliphatic_Atom_Count, Chain_Atom_Count, H-Bond_Acceptor_Sites, pI, logD, logP, Bond_Count, Refractivity, Molecular_Polarizability, Atom_Count, Exact_Mass, Rotatable_Bond_Count, Molecular_Weight, H-Bond_Acceptor_Count, Aromatic_Atom_Count, Fused_Aromatic_Ring_Count, Largest_Ring_System_Size, Aromatic_Bond_Count, Ring_System_Count, Ring_Count, Smallest_Ring_Size, Largest_Ring_Size, Fragment_Count, Cyclomatic_Number, | 74.8 | 0.401 |



|                                |        |                                                                                                                                                                                                                                                                                                                                                                                                                                  |      |       |
|--------------------------------|--------|----------------------------------------------------------------------------------------------------------------------------------------------------------------------------------------------------------------------------------------------------------------------------------------------------------------------------------------------------------------------------------------------------------------------------------|------|-------|
|                                |        | Smallest_Ring_System_Size,<br>Asymmetric_Atomic_Count,<br>Heteroaromatic_Ring_Count,<br>Fused_Ring_Count,<br>Aliphatic_Ring_Count,<br>Carbo_Ring_Count,<br>Carboaliphatic_Ring_Count,<br>Carboaromatic_Ring_Count,<br>Aromatic_Ring_Count,<br>Stereo_Double_Bond_Count,<br>Heteroaliphatic_Ring_Count,<br>Hetero_Ring_Count,<br>Chiral_Center_Count,<br>Ring_Atomic_Count,<br>Ring_Bond_Count,<br>Fused_Aliphatic_Ring_Count     |      |       |
| SymmetricalUncertAttributeEval | Ranker | pI, logP, Harray_Index,<br>Molecular_Polarizability,<br>Bond_Count, Refractivity,<br>Rotatable_Bond_Count,<br>Atom_Count, H-<br>Bond_Acceptor_Sites,<br>Hyper_Wiener_Index, logD,<br>Aliphatic_Bond_Count,<br>Chain_Bond_Count,<br>Chain_Atomic_Count,<br>Exact_Mass,<br>Aliphatic_Atomic_Count,<br>Molecular_Weight,<br>Wiener_Index, Randic_Index,<br>Platt_Index, Szeged_Index,<br>H-Bond_Donor_Count,<br>Wiener_Polarity, H- | 74.8 | 0.401 |

|                   |                |                                             |  |  |
|-------------------|----------------|---------------------------------------------|--|--|
|                   |                | Bond_Donor_Sites, H-<br>Bond_Acceptor_Count |  |  |
| WrapperSubsetEval | GreedyStepwise | NO ATTRIBUTES<br>SELECTED                   |  |  |

## References

1. Wieser, M. E. *Atomic weights of the elements 2005 (IUPAC Technical Report)*"; Pure Appl. Chem., 2006; pp 2051-2066.
2. Audi, G., *Nuclear Physics* **1995**, *4*, 409-480.
3. Viswanadhan, V. N.; Ghose, A. K.; Revankar, G. R.; Robins, R. K., *Journal of chemical information and computer sciences* **1989**, *29*, 163-172.
4. ChemAxon *Marvin 5.12.4*, 2013.
5. Tomalia, D. A.; Naylor, A. M.; Goddard, W. A., *Angewandte Chemie International Edition in English* **1990**, *29* (2), 138-175.
6. Prieto, M. J.; del Rio Zabala, N. E.; Marotta, C. H.; Carreno Gutierrez, H.; Arevalo Arevalo, R.; Chiaramoni, N. S.; del Valle Alonso, S., *PloS one* **2014**, *9* (2), e90393.
7. Vázquez-Olmos, A.; Díaz, D.; Rodríguez-Gattorno, G.; Saniger-Blesa, J. M., *Colloid and polymer science* **2003**, *282* (9), 957-964.
8. Satoh, K.; Yoshimura, T.; Esumi, K., *Journal of colloid and interface science* **2002**, *255*, 312-322.
9. Kitchens, K. M.; Kolhatkar, R. B.; Swaan, P. W.; Eddington, N. D.; Ghandehari, H., *Pharmaceutical research* **2006**, *23* (12), 2818-2826.
10. Devarakonda, B.; Hill, R. A.; de Villiers, M. M., *International journal of pharmaceutics* **2004**, *284* (1-2), 133-140.
11. Sweet, D. M.; Kolhatkar, R. B.; Ray, A.; Swaan, P.; Ghandehari, H., *Journal of controlled release : official journal of the Controlled Release Society* **2009**, *138* (1), 78-85.
12. El-Sayed, M.; Ginski, M.; Rhodes, C. A.; Ghandehari, H., *journal of Bioactive and Compatible Polymers* **2003**, *18* (1), 7-22.
