# Supplementary material for: Predicting cytotoxicity of PAMAM dendrimers using molecular descriptors
Source: Beilstein J Nanotechnol. 2015 Sep 11;6:1886–96. doi: 10.3762/bjnano.6.192 (PMC4660915; doi:10.3762/bjnano.6.192)
Supplement: File 2 — Raw Data. This is the dataset containing all of the raw data used for all of the analyses in this study. [file Beilstein_J_Nanotechnol-06-1886-s002.xlsx]

## Sheet: S2
Cytotoxicity_Concentration (mM)	Cell_Viability (%)	Molecular_Weight	Exact_Mass	Atom_Count	pI	logP	logD	Molecular_Polarizability	Aliphatic_Atom_Count	Aliphatic_Bond_Count	Aromatic_Atom_Count	Aromatic_Bond_Count	Asymetric_Atom_Count	Bond_Count	Chain_Atom_Count	Chain_Bond_Count	Chiral_Center_Count	Ring_Atom_Count	Ring_Bond_Count	Rotatable_Bond_Count	Stereo_Double_Bond_Count	Aliphatic_Ring_Count	Aromatic_Ring_Count	Carbo_Ring_Count	Carboaliphatic_Ring_Count	Carboaromatic_Ring_Count	Fused_Aliphatic_Ring_Count	Fused_Aromatic_Ring_Count	Fused_Ring_Count	Hetero_Ring_Count	Heteroaliphatic_Ring_Count	Heteroaromatic_Ring_Count	Largest_Ring_Size	Largest_Ring_System_Size	Ring_Count	Ring_System_Count	Smallest_Ring_Size	Smallest_Ring_System_Size	Platt_Index	Randic_Index	Harary_Index	Hyper_Wiener_Index	Szeged_Index	Wiener_Index	Wiener_Polarity	Cyclomatic_Number	Fragment_Count	H-Bond_Donor_Count	H-Bond_Donor_Sites
1	100	516.681	516.386	84	12.63	-6.45	-18.95	55.28	36	35	0	0	0	83	36	35	0	0	0	23	0	0	0	0	0	0	0	0	0	0	0	0	0	0	0	0	0	0	80	17.35	134.82	26135	4858	4858	41	0	1	8	12
2	100	516.681	516.386	84	12.63	-6.45	-18.95	55.28	36	35	0	0	0	83	36	35	0	0	0	23	0	0	0	0	0	0	0	0	0	0	0	0	0	0	0	0	0	0	80	17.35	134.82	26135	4858	4858	41	0	1	8	12
5	100	516.681	516.386	84	12.63	-6.45	-18.95	55.28	36	35	0	0	0	83	36	35	0	0	0	23	0	0	0	0	0	0	0	0	0	0	0	0	0	0	0	0	0	0	80	17.35	134.82	26135	4858	4858	41	0	1	8	12
10	96	516.681	516.386	84	12.63	-6.45	-18.95	55.28	36	35	0	0	0	83	36	35	0	0	0	23	0	0	0	0	0	0	0	0	0	0	0	0	0	0	0	0	0	0	80	17.35	134.82	26135	4858	4858	41	0	1	8	12
0.1	98	1429.85	1429.02	228	12.47	-16.51	-36.84	150.96	100	99	0	0	0	227	100	99	0	0	0	67	0	0	0	0	0	0	0	0	0	0	0	0	0	0	0	0	0	0	232	48.23	555.76	786663	77402	77402	121	0	1	20	28
0.25	97	1429.85	1429.02	228	12.47	-16.51	-36.84	150.96	100	99	0	0	0	227	100	99	0	0	0	67	0	0	0	0	0	0	0	0	0	0	0	0	0	0	0	0	0	0	232	48.23	555.76	786663	77402	77402	121	0	1	20	28
0.5	95	1429.85	1429.02	228	12.47	-16.51	-36.84	150.96	100	99	0	0	0	227	100	99	0	0	0	67	0	0	0	0	0	0	0	0	0	0	0	0	0	0	0	0	0	0	232	48.23	555.76	786663	77402	77402	121	0	1	20	28
1	90	1429.85	1429.02	228	12.47	-16.51	-36.84	150.96	100	99	0	0	0	227	100	99	0	0	0	67	0	0	0	0	0	0	0	0	0	0	0	0	0	0	0	0	0	0	232	48.23	555.76	786663	77402	77402	121	0	1	20	28
0.01	100.5	2582.85	2581.36	372	4.85	-14.55	-41.81	248.71	180	179	0	0	0	371	180	179	0	0	0	0	0	0	0	0	0	0	0	0	0	0	0	0	0	0	0	0	0	0	440	85.38	1257.94	4944087	357210	357210	217	0	1	28	28
0.1	110.3	2582.85	2581.36	372	4.85	-14.55	-41.81	248.71	180	179	0	0	0	371	180	179	0	0	0	0	0	0	0	0	0	0	0	0	0	0	0	0	0	0	0	0	0	0	440	85.38	1257.94	4944087	357210	357210	217	0	1	28	28
1	105.4	2582.85	2581.36	372	4.85	-14.55	-41.81	248.71	180	179	0	0	0	371	180	179	0	0	0	0	0	0	0	0	0	0	0	0	0	0	0	0	0	0	0	0	0	0	440	85.38	1257.94	4944087	357210	357210	217	0	1	28	28
0.01	80.3	3256.18	3254.29	516	12.7	-36.63	-56.96	342.3	228	227	0	0	0	515	228	227	0	0	0	155	0	0	0	0	0	0	0	0	0	0	0	0	0	0	0	0	0	0	536	109.99	1750.47	10042631	650266	650266	281	0	1	44	60
0.01	96	3256.18	3254.29	516	12.7	-36.63	-56.96	342.3	228	227	0	0	0	515	228	227	0	0	0	155	0	0	0	0	0	0	0	0	0	0	0	0	0	0	0	0	0	0	536	109.99	1750.47	10042631	650266	650266	281	0	1	44	60
0.1	100	3256.18	3254.29	516	12.7	-36.63	-56.96	342.3	228	227	0	0	0	515	228	227	0	0	0	155	0	0	0	0	0	0	0	0	0	0	0	0	0	0	0	0	0	0	536	109.99	1750.47	10042631	650266	650266	281	0	1	44	60
0.05	100	3256.18	3254.29	516	12.7	-36.63	-56.96	342.3	228	227	0	0	0	515	228	227	0	0	0	155	0	0	0	0	0	0	0	0	0	0	0	0	0	0	0	0	0	0	536	109.99	1750.47	10042631	650266	650266	281	0	1	44	60
0.1	78	3256.18	3254.29	516	12.7	-36.63	-56.96	342.3	228	227	0	0	0	515	228	227	0	0	0	155	0	0	0	0	0	0	0	0	0	0	0	0	0	0	0	0	0	0	536	109.99	1750.47	10042631	650266	650266	281	0	1	44	60
0.1	82	3256.18	3254.29	516	12.7	-36.63	-56.96	342.3	228	227	0	0	0	515	228	227	0	0	0	155	0	0	0	0	0	0	0	0	0	0	0	0	0	0	0	0	0	0	536	109.99	1750.47	10042631	650266	650266	281	0	1	44	60
0.15	98	3256.18	3254.29	516	12.7	-36.63	-56.96	342.3	228	227	0	0	0	515	228	227	0	0	0	155	0	0	0	0	0	0	0	0	0	0	0	0	0	0	0	0	0	0	536	109.99	1750.47	10042631	650266	650266	281	0	1	44	60
0.2	100	3256.18	3254.29	516	12.7	-36.63	-56.96	342.3	228	227	0	0	0	515	228	227	0	0	0	155	0	0	0	0	0	0	0	0	0	0	0	0	0	0	0	0	0	0	536	109.99	1750.47	10042631	650266	650266	281	0	1	44	60
0.4	100	3256.18	3254.29	516	12.7	-36.63	-56.96	342.3	228	227	0	0	0	515	228	227	0	0	0	155	0	0	0	0	0	0	0	0	0	0	0	0	0	0	0	0	0	0	536	109.99	1750.47	10042631	650266	650266	281	0	1	44	60
0.7	95	3256.18	3254.29	516	12.7	-36.63	-56.96	342.3	228	227	0	0	0	515	228	227	0	0	0	155	0	0	0	0	0	0	0	0	0	0	0	0	0	0	0	0	0	0	536	109.99	1750.47	10042631	650266	650266	281	0	1	44	60
1	80	3256.18	3254.29	516	12.7	-36.63	-56.96	342.3	228	227	0	0	0	515	228	227	0	0	0	155	0	0	0	0	0	0	0	0	0	0	0	0	0	0	0	0	0	0	536	109.99	1750.47	10042631	650266	650266	281	0	1	44	60
1	86.8	3256.18	3254.29	516	12.7	-36.63	-56.96	342.3	228	227	0	0	0	515	228	227	0	0	0	155	0	0	0	0	0	0	0	0	0	0	0	0	0	0	0	0	0	0	536	109.99	1750.47	10042631	650266	650266	281	0	1	44	60
1	55	3256.18	3254.29	516	12.7	-36.63	-56.96	342.3	228	227	0	0	0	515	228	227	0	0	0	155	0	0	0	0	0	0	0	0	0	0	0	0	0	0	0	0	0	0	536	109.99	1750.47	10042631	650266	650266	281	0	1	44	60
0.01	103.7	3271.93	3270.03	500	12.25	-34.92	-53.7	328.4	228	227	0	0	0	499	228	227	0	0	0	0	0	0	0	0	0	0	0	0	0	0	0	0	0	0	0	0	0	0	536	109.99	1750.47	10042631	650266	650266	281	0	1	44	44
0.1	103.6	3271.93	3270.03	500	12.25	-34.92	-53.7	328.4	228	227	0	0	0	499	228	227	0	0	0	0	0	0	0	0	0	0	0	0	0	0	0	0	0	0	0	0	0	0	536	109.99	1750.47	10042631	650266	650266	281	0	1	44	44
1	96.7	3271.93	3270.03	500	12.25	-34.92	-53.7	328.4	228	227	0	0	0	499	228	227	0	0	0	0	0	0	0	0	0	0	0	0	0	0	0	0	0	0	0	0	0	0	536	109.99	1750.47	10042631	650266	650266	281	0	1	44	44
0.01	109.1	5562.18	5558.97	804	5.88	-32.7	-60.94	537.79	388	387	0	0	0	803	388	387	0	0	0	267	0	0	0	0	0	0	0	0	0	0	0	0	0	0	0	0	0	0	952	184.28	12.45	47578695	2450266	2450266	473	0	1	60	60
0.05	100	5562.18	5558.97	804	5.88	-32.7	-60.94	537.79	388	387	0	0	0	803	388	387	0	0	0	267	0	0	0	0	0	0	0	0	0	0	0	0	0	0	0	0	0	0	952	184.28	12.45	47578695	2450266	2450266	473	0	1	60	60
0.1	100	5562.18	5558.97	804	5.88	-32.7	-60.94	537.79	388	387	0	0	0	803	388	387	0	0	0	267	0	0	0	0	0	0	0	0	0	0	0	0	0	0	0	0	0	0	952	184.28	12.45	47578695	2450266	2450266	473	0	1	60	60
0.05	99	5562.18	5558.97	804	5.88	-32.7	-60.94	537.79	388	387	0	0	0	803	388	387	0	0	0	267	0	0	0	0	0	0	0	0	0	0	0	0	0	0	0	0	0	0	952	184.28	12.45	47578695	2450266	2450266	473	0	1	60	60
0.1	91.6	5562.18	5558.97	804	5.88	-32.7	-60.94	537.79	388	387	0	0	0	803	388	387	0	0	0	267	0	0	0	0	0	0	0	0	0	0	0	0	0	0	0	0	0	0	952	184.28	12.45	47578695	2450266	2450266	473	0	1	60	60
0.15	100	5562.18	5558.97	804	5.88	-32.7	-60.94	537.79	388	387	0	0	0	803	388	387	0	0	0	267	0	0	0	0	0	0	0	0	0	0	0	0	0	0	0	0	0	0	952	184.28	12.45	47578695	2450266	2450266	473	0	1	60	60
0.15	100	5562.18	5558.97	804	5.88	-32.7	-60.94	537.79	388	387	0	0	0	803	388	387	0	0	0	267	0	0	0	0	0	0	0	0	0	0	0	0	0	0	0	0	0	0	952	184.28	12.45	47578695	2450266	2450266	473	0	1	60	60
0.2	100	5562.18	5558.97	804	5.88	-32.7	-60.94	537.79	388	387	0	0	0	803	388	387	0	0	0	267	0	0	0	0	0	0	0	0	0	0	0	0	0	0	0	0	0	0	952	184.28	12.45	47578695	2450266	2450266	473	0	1	60	60
0.4	100	5562.18	5558.97	804	5.88	-32.7	-60.94	537.79	388	387	0	0	0	803	388	387	0	0	0	267	0	0	0	0	0	0	0	0	0	0	0	0	0	0	0	0	0	0	952	184.28	12.45	47578695	2450266	2450266	473	0	1	60	60
0.7	100	5562.18	5558.97	804	5.88	-32.7	-60.94	537.79	388	387	0	0	0	803	388	387	0	0	0	267	0	0	0	0	0	0	0	0	0	0	0	0	0	0	0	0	0	0	952	184.28	12.45	47578695	2450266	2450266	473	0	1	60	60
1	97	5562.18	5558.97	804	5.88	-32.7	-60.94	537.79	388	387	0	0	0	803	388	387	0	0	0	267	0	0	0	0	0	0	0	0	0	0	0	0	0	0	0	0	0	0	952	184.28	12.45	47578695	2450266	2450266	473	0	1	60	60
1	108.3	5562.18	5558.97	804	5.88	-32.7	-60.94	537.79	388	387	0	0	0	803	388	387	0	0	0	267	0	0	0	0	0	0	0	0	0	0	0	0	0	0	0	0	0	0	952	184.28	12.45	47578695	2450266	2450266	473	0	1	60	60
5e-05	93	6908.84	6904.83	1092	12.84	-77.05	-99.19	725	484	483	0	0	0	1091	484	483	0	0	0	331	0	0	0	0	0	0	0	0	0	0	0	0	0	0	0	0	0	0	1144	233.5	5136.23	88896347	4204882	4204882	601	0	1	92	124
0.0001	95	6908.84	6904.83	1092	12.84	-77.05	-99.19	725	484	483	0	0	0	1091	484	483	0	0	0	331	0	0	0	0	0	0	0	0	0	0	0	0	0	0	0	0	0	0	1144	233.5	5136.23	88896347	4204882	4204882	601	0	1	92	124
0.0002	91	6908.84	6904.83	1092	12.84	-77.05	-99.19	725	484	483	0	0	0	1091	484	483	0	0	0	331	0	0	0	0	0	0	0	0	0	0	0	0	0	0	0	0	0	0	1144	233.5	5136.23	88896347	4204882	4204882	601	0	1	92	124
0.0005	91	6908.84	6904.83	1092	12.84	-77.05	-99.19	725	484	483	0	0	0	1091	484	483	0	0	0	331	0	0	0	0	0	0	0	0	0	0	0	0	0	0	0	0	0	0	1144	233.5	5136.23	88896347	4204882	4204882	601	0	1	92	124
0.001	93	6908.84	6904.83	1092	12.84	-77.05	-99.19	725	484	483	0	0	0	1091	484	483	0	0	0	331	0	0	0	0	0	0	0	0	0	0	0	0	0	0	0	0	0	0	1144	233.5	5136.23	88896347	4204882	4204882	601	0	1	92	124
0.001	100	6908.84	6904.83	1092	12.84	-77.05	-99.19	725	484	483	0	0	0	1091	484	483	0	0	0	331	0	0	0	0	0	0	0	0	0	0	0	0	0	0	0	0	0	0	1144	233.5	5136.23	88896347	4204882	4204882	601	0	1	92	124
0.005	92	6908.84	6904.83	1092	12.84	-77.05	-99.19	725	484	483	0	0	0	1091	484	483	0	0	0	331	0	0	0	0	0	0	0	0	0	0	0	0	0	0	0	0	0	0	1144	233.5	5136.23	88896347	4204882	4204882	601	0	1	92	124
0.01	82	6908.84	6904.83	1092	12.84	-77.05	-99.19	725	484	483	0	0	0	1091	484	483	0	0	0	331	0	0	0	0	0	0	0	0	0	0	0	0	0	0	0	0	0	0	1144	233.5	5136.23	88896347	4204882	4204882	601	0	1	92	124
0.01	98	6908.84	6904.83	1092	12.84	-77.05	-99.19	725	484	483	0	0	0	1091	484	483	0	0	0	331	0	0	0	0	0	0	0	0	0	0	0	0	0	0	0	0	0	0	1144	233.5	5136.23	88896347	4204882	4204882	601	0	1	92	124
0.01	98	6908.84	6904.83	1092	12.84	-77.05	-99.19	725	484	483	0	0	0	1091	484	483	0	0	0	331	0	0	0	0	0	0	0	0	0	0	0	0	0	0	0	0	0	0	1144	233.5	5136.23	88896347	4204882	4204882	601	0	1	92	124
0.015	82	6908.84	6904.83	1092	12.84	-77.05	-99.19	725	484	483	0	0	0	1091	484	483	0	0	0	331	0	0	0	0	0	0	0	0	0	0	0	0	0	0	0	0	0	0	1144	233.5	5136.23	88896347	4204882	4204882	601	0	1	92	124
0.02	73	6908.84	6904.83	1092	12.84	-77.05	-99.19	725	484	483	0	0	0	1091	484	483	0	0	0	331	0	0	0	0	0	0	0	0	0	0	0	0	0	0	0	0	0	0	1144	233.5	5136.23	88896347	4204882	4204882	601	0	1	92	124
0.025	72	6908.84	6904.83	1092	12.84	-77.05	-99.19	725	484	483	0	0	0	1091	484	483	0	0	0	331	0	0	0	0	0	0	0	0	0	0	0	0	0	0	0	0	0	0	1144	233.5	5136.23	88896347	4204882	4204882	601	0	1	92	124
0.025	83	6908.84	6904.83	1092	12.84	-77.05	-99.19	725	484	483	0	0	0	1091	484	483	0	0	0	331	0	0	0	0	0	0	0	0	0	0	0	0	0	0	0	0	0	0	1144	233.5	5136.23	88896347	4204882	4204882	601	0	1	92	124
0.05	84	6908.84	6904.83	1092	12.84	-77.05	-99.19	725	484	483	0	0	0	1091	484	483	0	0	0	331	0	0	0	0	0	0	0	0	0	0	0	0	0	0	0	0	0	0	1144	233.5	5136.23	88896347	4204882	4204882	601	0	1	92	124
0.08	60	6908.84	6904.83	1092	12.84	-77.05	-99.19	725	484	483	0	0	0	1091	484	483	0	0	0	331	0	0	0	0	0	0	0	0	0	0	0	0	0	0	0	0	0	0	1144	233.5	5136.23	88896347	4204882	4204882	601	0	1	92	124
0.1	80	6908.84	6904.83	1092	12.84	-77.05	-99.19	725	484	483	0	0	0	1091	484	483	0	0	0	331	0	0	0	0	0	0	0	0	0	0	0	0	0	0	0	0	0	0	1144	233.5	5136.23	88896347	4204882	4204882	601	0	1	92	124
0.1	57	6908.84	6904.83	1092	12.84	-77.05	-99.19	725	484	483	0	0	0	1091	484	483	0	0	0	331	0	0	0	0	0	0	0	0	0	0	0	0	0	0	0	0	0	0	1144	233.5	5136.23	88896347	4204882	4204882	601	0	1	92	124
0.1	90	6908.84	6904.83	1092	12.84	-77.05	-99.19	725	484	483	0	0	0	1091	484	483	0	0	0	331	0	0	0	0	0	0	0	0	0	0	0	0	0	0	0	0	0	0	1144	233.5	5136.23	88896347	4204882	4204882	601	0	1	92	124
0.25	40	6908.84	6904.83	1092	12.84	-77.05	-99.19	725	484	483	0	0	0	1091	484	483	0	0	0	331	0	0	0	0	0	0	0	0	0	0	0	0	0	0	0	0	0	0	1144	233.5	5136.23	88896347	4204882	4204882	601	0	1	92	124
0.5	4	6908.84	6904.83	1092	12.84	-77.05	-99.19	725	484	483	0	0	0	1091	484	483	0	0	0	331	0	0	0	0	0	0	0	0	0	0	0	0	0	0	0	0	0	0	1144	233.5	5136.23	88896347	4204882	4204882	601	0	1	92	124
1	35	6908.84	6904.83	1092	12.84	-77.05	-99.19	725	484	483	0	0	0	1091	484	483	0	0	0	331	0	0	0	0	0	0	0	0	0	0	0	0	0	0	0	0	0	0	1144	233.5	5136.23	88896347	4204882	4204882	601	0	1	92	124
0.001	99	11520.9	11514.2	1668	8.13	-69.19	-97.42	1115.95	804	803	0	0	0	1667	804	803	0	0	0	555	0	0	0	0	0	0	0	0	0	0	0	0	0	0	0	0	0	0	1976	382.09	10871.1	362007047	14283178	14283178	985	0	1	124	124
0.01	100	11520.9	11514.2	1668	8.13	-69.19	-97.42	1115.95	804	803	0	0	0	1667	804	803	0	0	0	555	0	0	0	0	0	0	0	0	0	0	0	0	0	0	0	0	0	0	1976	382.09	10871.1	362007047	14283178	14283178	985	0	1	124	124
0.01	90.7	11520.9	11514.2	1668	8.13	-69.19	-97.42	1115.95	804	803	0	0	0	1667	804	803	0	0	0	555	0	0	0	0	0	0	0	0	0	0	0	0	0	0	0	0	0	0	1976	382.09	10871.1	362007047	14283178	14283178	985	0	1	124	124
0.01	99	11520.9	11514.2	1668	8.13	-69.19	-97.42	1115.95	804	803	0	0	0	1667	804	803	0	0	0	555	0	0	0	0	0	0	0	0	0	0	0	0	0	0	0	0	0	0	1976	382.09	10871.1	362007047	14283178	14283178	985	0	1	124	124
0.05	100	11520.9	11514.2	1668	8.13	-69.19	-97.42	1115.95	804	803	0	0	0	1667	804	803	0	0	0	555	0	0	0	0	0	0	0	0	0	0	0	0	0	0	0	0	0	0	1976	382.09	10871.1	362007047	14283178	14283178	985	0	1	124	124
0.1	98	11520.9	11514.2	1668	8.13	-69.19	-97.42	1115.95	804	803	0	0	0	1667	804	803	0	0	0	555	0	0	0	0	0	0	0	0	0	0	0	0	0	0	0	0	0	0	1976	382.09	10871.1	362007047	14283178	14283178	985	0	1	124	124
0.1	100	11520.9	11514.2	1668	8.13	-69.19	-97.42	1115.95	804	803	0	0	0	1667	804	803	0	0	0	555	0	0	0	0	0	0	0	0	0	0	0	0	0	0	0	0	0	0	1976	382.09	10871.1	362007047	14283178	14283178	985	0	1	124	124
0.1	88.6	11520.9	11514.2	1668	8.13	-69.19	-97.42	1115.95	804	803	0	0	0	1667	804	803	0	0	0	555	0	0	0	0	0	0	0	0	0	0	0	0	0	0	0	0	0	0	1976	382.09	10871.1	362007047	14283178	14283178	985	0	1	124	124
0.1	100	11520.9	11514.2	1668	8.13	-69.19	-97.42	1115.95	804	803	0	0	0	1667	804	803	0	0	0	555	0	0	0	0	0	0	0	0	0	0	0	0	0	0	0	0	0	0	1976	382.09	10871.1	362007047	14283178	14283178	985	0	1	124	124
0.15	99	11520.9	11514.2	1668	8.13	-69.19	-97.42	1115.95	804	803	0	0	0	1667	804	803	0	0	0	555	0	0	0	0	0	0	0	0	0	0	0	0	0	0	0	0	0	0	1976	382.09	10871.1	362007047	14283178	14283178	985	0	1	124	124
0.2	98	11520.9	11514.2	1668	8.13	-69.19	-97.42	1115.95	804	803	0	0	0	1667	804	803	0	0	0	555	0	0	0	0	0	0	0	0	0	0	0	0	0	0	0	0	0	0	1976	382.09	10871.1	362007047	14283178	14283178	985	0	1	124	124
0.4	97	11520.9	11514.2	1668	8.13	-69.19	-97.42	1115.95	804	803	0	0	0	1667	804	803	0	0	0	555	0	0	0	0	0	0	0	0	0	0	0	0	0	0	0	0	0	0	1976	382.09	10871.1	362007047	14283178	14283178	985	0	1	124	124
0.7	98	11520.9	11514.2	1668	8.13	-69.19	-97.42	1115.95	804	803	0	0	0	1667	804	803	0	0	0	555	0	0	0	0	0	0	0	0	0	0	0	0	0	0	0	0	0	0	1976	382.09	10871.1	362007047	14283178	14283178	985	0	1	124	124
1	97	11520.9	11514.2	1668	8.13	-69.19	-97.42	1115.95	804	803	0	0	0	1667	804	803	0	0	0	555	0	0	0	0	0	0	0	0	0	0	0	0	0	0	0	0	0	0	1976	382.09	10871.1	362007047	14283178	14283178	985	0	1	124	124
1	86.8	11520.9	11514.2	1668	8.13	-69.19	-97.42	1115.95	804	803	0	0	0	1667	804	803	0	0	0	555	0	0	0	0	0	0	0	0	0	0	0	0	0	0	0	0	0	0	1976	382.09	10871.1	362007047	14283178	14283178	985	0	1	124	124
7.04e-06	87	14214.2	14205.9	2244	12.93	-157.52	-179.67	1490.39	996	995	0	0	0	2243	996	995	0	0	0	683	0	0	0	0	0	0	0	0	0	0	0	0	0	0	0	0	0	0	2360	480.53	15011.5	643881019	23714834	23714834	1241	0	1	188	252
7.035e-05	83	14214.2	14205.9	2244	12.93	-157.52	-179.67	1490.39	996	995	0	0	0	2243	996	995	0	0	0	683	0	0	0	0	0	0	0	0	0	0	0	0	0	0	0	0	0	0	2360	480.53	15011.5	643881019	23714834	23714834	1241	0	1	188	252
0.00070352	75	14214.2	14205.9	2244	12.93	-157.52	-179.67	1490.39	996	995	0	0	0	2243	996	995	0	0	0	683	0	0	0	0	0	0	0	0	0	0	0	0	0	0	0	0	0	0	2360	480.53	15011.5	643881019	23714834	23714834	1241	0	1	188	252
0.001	88	14214.2	14205.9	2244	12.93	-157.52	-179.67	1490.39	996	995	0	0	0	2243	996	995	0	0	0	683	0	0	0	0	0	0	0	0	0	0	0	0	0	0	0	0	0	0	2360	480.53	15011.5	643881019	23714834	23714834	1241	0	1	188	252
0.002	79	14214.2	14205.9	2244	12.93	-157.52	-179.67	1490.39	996	995	0	0	0	2243	996	995	0	0	0	683	0	0	0	0	0	0	0	0	0	0	0	0	0	0	0	0	0	0	2360	480.53	15011.5	643881019	23714834	23714834	1241	0	1	188	252
0.002	87	14214.2	14205.9	2244	12.93	-157.52	-179.67	1490.39	996	995	0	0	0	2243	996	995	0	0	0	683	0	0	0	0	0	0	0	0	0	0	0	0	0	0	0	0	0	0	2360	480.53	15011.5	643881019	23714834	23714834	1241	0	1	188	252
0.00351762	73	14214.2	14205.9	2244	12.93	-157.52	-179.67	1490.39	996	995	0	0	0	2243	996	995	0	0	0	683	0	0	0	0	0	0	0	0	0	0	0	0	0	0	0	0	0	0	2360	480.53	15011.5	643881019	23714834	23714834	1241	0	1	188	252
0.004	90	14214.2	14205.9	2244	12.93	-157.52	-179.67	1490.39	996	995	0	0	0	2243	996	995	0	0	0	683	0	0	0	0	0	0	0	0	0	0	0	0	0	0	0	0	0	0	2360	480.53	15011.5	643881019	23714834	23714834	1241	0	1	188	252
0.005	62	14214.2	14205.9	2244	12.93	-157.52	-179.67	1490.39	996	995	0	0	0	2243	996	995	0	0	0	683	0	0	0	0	0	0	0	0	0	0	0	0	0	0	0	0	0	0	2360	480.53	15011.5	643881019	23714834	23714834	1241	0	1	188	252
0.006	94	14214.2	14205.9	2244	12.93	-157.52	-179.67	1490.39	996	995	0	0	0	2243	996	995	0	0	0	683	0	0	0	0	0	0	0	0	0	0	0	0	0	0	0	0	0	0	2360	480.53	15011.5	643881019	23714834	23714834	1241	0	1	188	252
0.00703524	70	14214.2	14205.9	2244	12.93	-157.52	-179.67	1490.39	996	995	0	0	0	2243	996	995	0	0	0	683	0	0	0	0	0	0	0	0	0	0	0	0	0	0	0	0	0	0	2360	480.53	15011.5	643881019	23714834	23714834	1241	0	1	188	252
0.008	96	14214.2	14205.9	2244	12.93	-157.52	-179.67	1490.39	996	995	0	0	0	2243	996	995	0	0	0	683	0	0	0	0	0	0	0	0	0	0	0	0	0	0	0	0	0	0	2360	480.53	15011.5	643881019	23714834	23714834	1241	0	1	188	252
0.01	57	14214.2	14205.9	2244	12.93	-157.52	-179.67	1490.39	996	995	0	0	0	2243	996	995	0	0	0	683	0	0	0	0	0	0	0	0	0	0	0	0	0	0	0	0	0	0	2360	480.53	15011.5	643881019	23714834	23714834	1241	0	1	188	252
0.01	93	14214.2	14205.9	2244	12.93	-157.52	-179.67	1490.39	996	995	0	0	0	2243	996	995	0	0	0	683	0	0	0	0	0	0	0	0	0	0	0	0	0	0	0	0	0	0	2360	480.53	15011.5	643881019	23714834	23714834	1241	0	1	188	252
0.01	66.7	14214.2	14205.9	2244	12.93	-157.52	-179.67	1490.39	996	995	0	0	0	2243	996	995	0	0	0	683	0	0	0	0	0	0	0	0	0	0	0	0	0	0	0	0	0	0	2360	480.53	15011.5	643881019	23714834	23714834	1241	0	1	188	252
0.01	86	14214.2	14205.9	2244	12.93	-157.52	-179.67	1490.39	996	995	0	0	0	2243	996	995	0	0	0	683	0	0	0	0	0	0	0	0	0	0	0	0	0	0	0	0	0	0	2360	480.53	15011.5	643881019	23714834	23714834	1241	0	1	188	252
0.0140705	61	14214.2	14205.9	2244	12.93	-157.52	-179.67	1490.39	996	995	0	0	0	2243	996	995	0	0	0	683	0	0	0	0	0	0	0	0	0	0	0	0	0	0	0	0	0	0	2360	480.53	15011.5	643881019	23714834	23714834	1241	0	1	188	252
0.03	57	14214.2	14205.9	2244	12.93	-157.52	-179.67	1490.39	996	995	0	0	0	2243	996	995	0	0	0	683	0	0	0	0	0	0	0	0	0	0	0	0	0	0	0	0	0	0	2360	480.53	15011.5	643881019	23714834	23714834	1241	0	1	188	252
0.08	57	14214.2	14205.9	2244	12.93	-157.52	-179.67	1490.39	996	995	0	0	0	2243	996	995	0	0	0	683	0	0	0	0	0	0	0	0	0	0	0	0	0	0	0	0	0	0	2360	480.53	15011.5	643881019	23714834	23714834	1241	0	1	188	252
0.1	52	14214.2	14205.9	2244	12.93	-157.52	-179.67	1490.39	996	995	0	0	0	2243	996	995	0	0	0	683	0	0	0	0	0	0	0	0	0	0	0	0	0	0	0	0	0	0	2360	480.53	15011.5	643881019	23714834	23714834	1241	0	1	188	252
0.1	60.2	14214.2	14205.9	2244	12.93	-157.52	-179.67	1490.39	996	995	0	0	0	2243	996	995	0	0	0	683	0	0	0	0	0	0	0	0	0	0	0	0	0	0	0	0	0	0	2360	480.53	15011.5	643881019	23714834	23714834	1241	0	1	188	252
0.1	55	14214.2	14205.9	2244	12.93	-157.52	-179.67	1490.39	996	995	0	0	0	2243	996	995	0	0	0	683	0	0	0	0	0	0	0	0	0	0	0	0	0	0	0	0	0	0	2360	480.53	15011.5	643881019	23714834	23714834	1241	0	1	188	252
1	38.1	14214.2	14205.9	2244	12.93	-157.52	-179.67	1490.39	996	995	0	0	0	2243	996	995	0	0	0	683	0	0	0	0	0	0	0	0	0	0	0	0	0	0	0	0	0	0	2360	480.53	15011.5	643881019	23714834	23714834	1241	0	1	188	252
1	26	14214.2	14205.9	2244	12.93	-157.52	-179.67	1490.39	996	995	0	0	0	2243	996	995	0	0	0	683	0	0	0	0	0	0	0	0	0	0	0	0	0	0	0	0	0	0	2360	480.53	15011.5	643881019	23714834	23714834	1241	0	1	188	252
0.001	95	23438.2	23424.6	3396	8.73	-141.8	-170.04	2272.27	1636	1635	0	0	0	3395	1636	1635	0	0	0	1131	0	0	0	0	0	0	0	0	0	0	0	0	0	0	0	0	0	0	4024	777.71	32238.3	243448803	75825090	75825090	2009	0	1	252	252
0.01	97	23438.2	23424.6	3396	8.73	-141.8	-170.04	2272.27	1636	1635	0	0	0	3395	1636	1635	0	0	0	1131	0	0	0	0	0	0	0	0	0	0	0	0	0	0	0	0	0	0	4024	777.71	32238.3	243448803	75825090	75825090	2009	0	1	252	252
0.1	100	23438.2	23424.6	3396	8.73	-141.8	-170.04	2272.27	1636	1635	0	0	0	3395	1636	1635	0	0	0	1131	0	0	0	0	0	0	0	0	0	0	0	0	0	0	0	0	0	0	4024	777.71	32238.3	243448803	75825090	75825090	2009	0	1	252	252
Validation Study	Test	Training
[truncated: 4 more columns]
