# Supplementary material for: Predicting cytotoxicity of PAMAM dendrimers using molecular descriptors
Source: Beilstein J Nanotechnol. 2015 Sep 11;6:1886–96. doi: 10.3762/bjnano.6.192 (PMC4660915; doi:10.3762/bjnano.6.192)
Supplement: File 3 — SMILES description of all the dendrimers studied here. [file Beilstein_J_Nanotechnol-06-1886-s003.smiles]

NCCNC(=O)CCN(CCN(CCC(=O)NCCN)CCC(=O)NCCN)CCC(=O)NCCN

NCCNC(=O)CCN(CCNC(=O)CCN(CCN(CCC(=O)NCCN(CCC(=O)NCCN)CCC(=O)NCCN)CCC(=O)NCCN(CCC(=O)NCCN)CCC(=O)NCCN)CCC(=O)NCCN(CCC(=O)NCCN)CCC(=O)NCCN)CCC(=O)NCCN

OC(=O)CCN(CCNC(=O)CCN(CCNC(=O)CCN(CCN(CCC(=O)NCCN(CCC(=O)NCCN(CCC(O)=O)CCC(O)=O)CCC(=O)NCCN(CCC(O)=O)CCC(O)=O)CCC(=O)NCCN(CCC(=O)NCCN(CCC(O)=O)CCC(O)=O)CCC(=O)NCCN(CCC(O)=O)CCC(O)=O)CCC(=O)NCCN(CCC(=O)NCCN(CCC(O)=O)CCC(O)=O)CCC(=O)NCCN(CCC(O)=O)CCC(O)=O)CCC(=O)NCCN(CCC(O)=O)CCC(O)=O)CCC(O)=O

OCCNC(=O)CCN(CCNC(=O)CCN(CCNC(=O)CCN(CCN(CCC(=O)NCCN(CCC(=O)NCCN(CCC(=O)NCCO)CCC(=O)NCCO)CCC(=O)NCCN(CCC(=O)NCCO)CCC(=O)NCCO)CCC(=O)NCCN(CCC(=O)NCCN(CCC(=O)NCCO)CCC(=O)NCCO)CCC(=O)NCCN(CCC(=O)NCCO)CCC(=O)NCCO)CCC(=O)NCCN(CCC(=O)NCCN(CCC(=O)NCCO)CCC(=O)NCCO)CCC(=O)NCCN(CCC(=O)NCCO)CCC(=O)NCCO)CCC(=O)NCCN(CCC(=O)NCCO)CCC(=O)NCCO)CCC(=O)NCCO

NCCNC(=O)CCN(CCNC(=O)CCN(CCNC(=O)CCN(CCN(CCC(=O)NCCN(CCC(=O)NCCN(CCC(=O)NCCN)CCC(=O)NCCN)CCC(=O)NCCN(CCC(=O)NCCN)CCC(=O)NCCN)CCC(=O)NCCN(CCC(=O)NCCN(CCC(=O)NCCN)CCC(=O)NCCN)CCC(=O)NCCN(CCC(=O)NCCN)CCC(=O)NCCN)CCC(=O)NCCN(CCC(=O)NCCN(CCC(=O)NCCN)CCC(=O)NCCN)CCC(=O)NCCN(CCC(=O)NCCN)CCC(=O)NCCN)CCC(=O)NCCN(CCC(=O)NCCN)CCC(=O)NCCN)CCC(=O)NCCN

OC(=O)CCN(CCNC(=O)CCN(CCNC(=O)CCN(CCNC(=O)CCN(CCN(CCC(=O)NCCN(CCC(=O)NCCN(CCC(=O)NCCN(CCC(O)=O)CCC(O)=O)CCC(=O)NCCN(CCC(O)=O)CCC(O)=O)CCC(=O)NCCN(CCC(=O)NCCN(CCC(O)=O)CCC(O)=O)CCC(=O)NCCN(CCC(O)=O)CCC(O)=O)CCC(=O)NCCN(CCC(=O)NCCN(CCC(=O)NCCN(CCC(O)=O)CCC(O)=O)CCC(=O)NCCN(CCC(O)=O)CCC(O)=O)CCC(=O)NCCN(CCC(=O)NCCN(CCC(O)=O)CCC(O)=O)CCC(=O)NCCN(CCC(O)=O)CCC(O)=O)CCC(=O)NCCN(CCC(=O)NCCN(CCC(=O)NCCN(CCC(O)=O)CCC(O)=O)CCC(=O)NCCN(CCC(O)=O)CCC(O)=O)CCC(=O)NCCN(CCC(=O)NCCN(CCC(O)=O)CCC(O)=O)CCC(=O)NCCN(CCC(O)=O)CCC(O)=O)CCC(=O)NCCN(CCC(=O)NCCN(CCC(O)=O)CCC(O)=O)CCC(=O)NCCN(CCC(O)=O)CCC(O)=O)CCC(=O)NCCN(CCC(O)=O)CCC(O)=O)CCC(O)=O

NCCNC(=O)CCN(CCCNC(=O)CN)CCNC(=O)CCN(CCNC(=O)CCN(CCNC(=O)CCN(CCN(CCC(=O)NCCN(CCC(=O)NCCN(CCC(=O)NCCN(CCC(=O)NCCN)CCC(=O)NCCN)CCC(=O)NCCN(CCC(=O)NCCN)CCC(=O)NCCN)CCC(=O)NCCN(CCC(=O)NCCN(CCC(=O)NCCN)CCC(=O)NCCN)CCC(=O)NCCN(CCC(=O)NCCN)CCC(=O)NCCN)CCC(=O)NCCN(CCC(=O)NCCN(CCC(=O)NCCN(CCC(=O)NCCN)CCC(=O)NCCN)CCC(=O)NCCN(CCC(=O)NCCN)CCC(=O)NCCN)CCC(=O)NCCN(CCC(=O)NCCN(CCC(=O)NCCN)CCC(=O)NCCN)CCC(=O)NCCN(CCC(=O)NCCN)CCC(=O)NCCN)CCC(=O)NCCN(CCC(=O)NCCN(CCC(=O)NCCN(CCC(=O)NCCN)CCC(=O)NCCN)CCC(=O)NCCN(CCC(=O)NCCN)CCC(=O)NCCN)CCC(=O)NCCN(CCC(=O)NCCN(CCC(=O)NCCN)CCC(=O)NCCN)CCC(=O)NCCN(CCC(=O)NCCN)CCC(=O)NCCN)CCC(=O)NCCN(CCC(=O)NCCN(CCC(=O)NCCN)CCC(=O)NCCN)CCC(=O)NCCN(CCC(=O)NCCN)CCC(=O)NCCN)CCC(=O)NCCN(CCC(=O)NCCN)CCC(=O)NCCN

OC(=O)CCN(CCNC(=O)CCN(CCCNC(=O)CN(CCC(O)=O)CCC(O)=O)CCNC(=O)CCN(CCNC(=O)CCN(CCNC(=O)CCN(CCN(CCC(=O)NCCN(CCC(=O)NCCN(CCC(=O)NCCN(CCC(=O)NCCN(CCC(O)=O)CCC(O)=O)CCC(=O)NCCN(CCC(O)=O)CCC(O)=O)CCC(=O)NCCN(CCC(=O)NCCN(CCC(O)=O)CCC(O)=O)CCC(=O)NCCN(CCC(O)=O)CCC(O)=O)CCC(=O)NCCN(CCC(=O)NCCN(CCC(=O)NCCN(CCC(O)=O)CCC(O)=O)CCC(=O)NCCN(CCC(O)=O)CCC(O)=O)CCC(=O)NCCN(CCC(=O)NCCN(CCC(O)=O)CCC(O)=O)CCC(=O)NCCN(CCC(O)=O)CCC(O)=O)CCC(=O)NCCN(CCC(=O)NCCN(CCC(=O)NCCN(CCC(=O)NCCN(CCC(O)=O)CCC(O)=O)CCC(=O)NCCN(CCC(O)=O)CCC(O)=O)CCC(=O)NCCN(CCC(=O)NCCN(CCC(O)=O)CCC(O)=O)CCC(=O)NCCN(CCC(O)=O)CCC(O)=O)CCC(=O)NCCN(CCC(=O)NCCN(CCC(=O)NCCN(CCC(O)=O)CCC(O)=O)CCC(=O)NCCN(CCC(O)=O)CCC(O)=O)CCC(=O)NCCN(CCC(=O)NCCN(CCC(O)=O)CCC(O)=O)CCC(=O)NCCN(CCC(O)=O)CCC(O)=O)CCC(=O)NCCN(CCC(=O)NCCN(CCC(=O)NCCN(CCC(=O)NCCN(CCC(O)=O)CCC(O)=O)CCC(=O)NCCN(CCC(O)=O)CCC(O)=O)CCC(=O)NCCN(CCC(=O)NCCN(CCC(O)=O)CCC(O)=O)CCC(=O)NCCN(CCC(O)=O)CCC(O)=O)CCC(=O)NCCN(CCC(=O)NCCN(CCC(=O)NCCN(CCC(O)=O)CCC(O)=O)CCC(=O)NCCN(CCC(O)=O)CCC(O)=O)CCC(=O)NCCN(CCC(=O)NCCN(CCC(O)=O)CCC(O)=O)CCC(=O)NCCN(CCC(O)=O)CCC(O)=O)CCC(=O)NCCN(CCC(=O)NCCN(CCC(=O)NCCN(CCC(O)=O)CCC(O)=O)CCC(=O)NCCN(CCC(O)=O)CCC(O)=O)CCC(=O)NCCN(CCC(=O)NCCN(CCC(O)=O)CCC(O)=O)CCC(=O)NCCN(CCC(O)=O)CCC(O)=O)CCC(=O)NCCN(CCC(=O)NCCN(CCC(O)=O)CCC(O)=O)CCC(=O)NCCN(CCC(O)=O)CCC(O)=O)CCC(O)=O

NCCNC(=O)CCN(CCNC(=O)CCN(CCCNC(=O)CN(CCC(=O)NCCN)CCC(=O)NCCN)CCNC(=O)CCN(CCNC(=O)CCN(CCNC(=O)CCN(CCN(CCC(=O)NCCN(CCC(=O)NCCN(CCC(=O)NCCN(CCC(=O)NCCN(CCC(=O)NCCN)CCC(=O)NCCN)CCC(=O)NCCN(CCC(=O)NCCN)CCC(=O)NCCN)CCC(=O)NCCN(CCC(=O)NCCN(CCC(=O)NCCN)CCC(=O)NCCN)CCC(=O)NCCN(CCC(=O)NCCN)CCC(=O)NCCN)CCC(=O)NCCN(CCC(=O)NCCN(CCC(=O)NCCN(CCC(=O)NCCN)CCC(=O)NCCN)CCC(=O)NCCN(CCC(=O)NCCN)CCC(=O)NCCN)CCC(=O)NCCN(CCC(=O)NCCN(CCC(=O)NCCN)CCC(=O)NCCN)CCC(=O)NCCN(CCC(=O)NCCN)CCC(=O)NCCN)CCC(=O)NCCN(CCC(=O)NCCN(CCC(=O)NCCN(CCC(=O)NCCN(CCC(=O)NCCN)CCC(=O)NCCN)CCC(=O)NCCN(CCC(=O)NCCN)CCC(=O)NCCN)CCC(=O)NCCN(CCC(=O)NCCN(CCC(=O)NCCN)CCC(=O)NCCN)CCC(=O)NCCN(CCC(=O)NCCN)CCC(=O)NCCN)CCC(=O)NCCN(CCC(=O)NCCN(CCC(=O)NCCN(CCC(=O)NCCN)CCC(=O)NCCN)CCC(=O)NCCN(CCC(=O)NCCN)CCC(=O)NCCN)CCC(=O)NCCN(CCC(=O)NCCN(CCC(=O)NCCN)CCC(=O)NCCN)CCC(=O)NCCN(CCC(=O)NCCN)CCC(=O)NCCN)CCC(=O)NCCN(CCC(=O)NCCN(CCC(=O)NCCN(CCC(=O)NCCN(CCC(=O)NCCN)CCC(=O)NCCN)CCC(=O)NCCN(CCC(=O)NCCN)CCC(=O)NCCN)CCC(=O)NCCN(CCC(=O)NCCN(CCC(=O)NCCN)CCC(=O)NCCN)CCC(=O)NCCN(CCC(=O)NCCN)CCC(=O)NCCN)CCC(=O)NCCN(CCC(=O)NCCN(CCC(=O)NCCN(CCC(=O)NCCN)CCC(=O)NCCN)CCC(=O)NCCN(CCC(=O)NCCN)CCC(=O)NCCN)CCC(=O)NCCN(CCC(=O)NCCN(CCC(=O)NCCN)CCC(=O)NCCN)CCC(=O)NCCN(CCC(=O)NCCN)CCC(=O)NCCN)CCC(=O)NCCN(CCC(=O)NCCN(CCC(=O)NCCN(CCC(=O)NCCN)CCC(=O)NCCN)CCC(=O)NCCN(CCC(=O)NCCN)CCC(=O)NCCN)CCC(=O)NCCN(CCC(=O)NCCN(CCC(=O)NCCN)CCC(=O)NCCN)CCC(=O)NCCN(CCC(=O)NCCN)CCC(=O)NCCN)CCC(=O)NCCN(CCC(=O)NCCN(CCC(=O)NCCN)CCC(=O)NCCN)CCC(=O)NCCN(CCC(=O)NCCN)CCC(=O)NCCN)CCC(=O)NCCN

OC(=O)CCN(CCNC(=O)CCN(CCNC(=O)CCN(CCCNC(=O)CN(CCC(=O)NCCN(CCC(O)=O)CCC(O)=O)CCC(=O)NCCN(CCC(O)=O)CCC(O)=O)CCNC(=O)CCN(CCNC(=O)CCN(CCNC(=O)CCN(CCN(CCC(=O)NCCN(CCC(=O)NCCN(CCC(=O)NCCN(CCC(=O)NCCN(CCC(=O)NCCN(CCC(O)=O)CCC(O)=O)CCC(=O)NCCN(CCC(O)=O)CCC(O)=O)CCC(=O)NCCN(CCC(=O)NCCN(CCC(O)=O)CCC(O)=O)CCC(=O)NCCN(CCC(O)=O)CCC(O)=O)CCC(=O)NCCN(CCC(=O)NCCN(CCC(=O)NCCN(CCC(O)=O)CCC(O)=O)CCC(=O)NCCN(CCC(O)=O)CCC(O)=O)CCC(=O)NCCN(CCC(=O)NCCN(CCC(O)=O)CCC(O)=O)CCC(=O)NCCN(CCC(O)=O)CCC(O)=O)CCC(=O)NCCN(CCC(=O)NCCN(CCC(=O)NCCN(CCC(=O)NCCN(CCC(O)=O)CCC(O)=O)CCC(=O)NCCN(CCC(O)=O)CCC(O)=O)CCC(=O)NCCN(CCC(=O)NCCN(CCC(O)=O)CCC(O)=O)CCC(=O)NCCN(CCC(O)=O)CCC(O)=O)CCC(=O)NCCN(CCC(=O)NCCN(CCC(=O)NCCN(CCC(O)=O)CCC(O)=O)CCC(=O)NCCN(CCC(O)=O)CCC(O)=O)CCC(=O)NCCN(CCC(=O)NCCN(CCC(O)=O)CCC(O)=O)CCC(=O)NCCN(CCC(O)=O)CCC(O)=O)CCC(=O)NCCN(CCC(=O)NCCN(CCC(=O)NCCN(CCC(=O)NCCN(CCC(=O)NCCN(CCC(O)=O)CCC(O)=O)CCC(=O)NCCN(CCC(O)=O)CCC(O)=O)CCC(=O)NCCN(CCC(=O)NCCN(CCC(O)=O)CCC(O)=O)CCC(=O)NCCN(CCC(O)=O)CCC(O)=O)CCC(=O)NCCN(CCC(=O)NCCN(CCC(=O)NCCN(CCC(O)=O)CCC(O)=O)CCC(=O)NCCN(CCC(O)=O)CCC(O)=O)CCC(=O)NCCN(CCC(=O)NCCN(CCC(O)=O)CCC(O)=O)CCC(=O)NCCN(CCC(O)=O)CCC(O)=O)CCC(=O)NCCN(CCC(=O)NCCN(CCC(=O)NCCN(CCC(=O)NCCN(CCC(O)=O)CCC(O)=O)CCC(=O)NCCN(CCC(O)=O)CCC(O)=O)CCC(=O)NCCN(CCC(=O)NCCN(CCC(O)=O)CCC(O)=O)CCC(=O)NCCN(CCC(O)=O)CCC(O)=O)CCC(=O)NCCN(CCC(=O)NCCN(CCC(=O)NCCN(CCC(O)=O)CCC(O)=O)CCC(=O)NCCN(CCC(O)=O)CCC(O)=O)CCC(=O)NCCN(CCC(=O)NCCN(CCC(O)=O)CCC(O)=O)CCC(=O)NCCN(CCC(O)=O)CCC(O)=O)CCC(=O)NCCN(CCC(=O)NCCN(CCC(=O)NCCN(CCC(=O)NCCN(CCC(=O)NCCN(CCC(O)=O)CCC(O)=O)CCC(=O)NCCN(CCC(O)=O)CCC(O)=O)CCC(=O)NCCN(CCC(=O)NCCN(CCC(O)=O)CCC(O)=O)CCC(=O)NCCN(CCC(O)=O)CCC(O)=O)CCC(=O)NCCN(CCC(=O)NCCN(CCC(=O)NCCN(CCC(O)=O)CCC(O)=O)CCC(=O)NCCN(CCC(O)=O)CCC(O)=O)CCC(=O)NCCN(CCC(=O)NCCN(CCC(O)=O)CCC(O)=O)CCC(=O)NCCN(CCC(O)=O)CCC(O)=O)CCC(=O)NCCN(CCC(=O)NCCN(CCC(=O)NCCN(CCC(=O)NCCN(CCC(O)=O)CCC(O)=O)CCC(=O)NCCN(CCC(O)=O)CCC(O)=O)CCC(=O)NCCN(CCC(=O)NCCN(CCC(O)=O)CCC(O)=O)CCC(=O)NCCN(CCC(O)=O)CCC(O)=O)CCC(=O)NCCN(CCC(=O)NCCN(CCC(=O)NCCN(CCC(O)=O)CCC(O)=O)CCC(=O)NCCN(CCC(O)=O)CCC(O)=O)CCC(=O)NCCN(CCC(=O)NCCN(CCC(O)=O)CCC(O)=O)CCC(=O)NCCN(CCC(O)=O)CCC(O)=O)CCC(=O)NCCN(CCC(=O)NCCN(CCC(=O)NCCN(CCC(=O)NCCN(CCC(O)=O)CCC(O)=O)CCC(=O)NCCN(CCC(O)=O)CCC(O)=O)CCC(=O)NCCN(CCC(=O)NCCN(CCC(O)=O)CCC(O)=O)CCC(=O)NCCN(CCC(O)=O)CCC(O)=O)CCC(=O)NCCN(CCC(=O)NCCN(CCC(=O)NCCN(CCC(O)=O)CCC(O)=O)CCC(=O)NCCN(CCC(O)=O)CCC(O)=O)CCC(=O)NCCN(CCC(=O)NCCN(CCC(O)=O)CCC(O)=O)CCC(=O)NCCN(CCC(O)=O)CCC(O)=O)CCC(=O)NCCN(CCC(=O)NCCN(CCC(=O)NCCN(CCC(O)=O)CCC(O)=O)CCC(=O)NCCN(CCC(O)=O)CCC(O)=O)CCC(=O)NCCN(CCC(=O)NCCN(CCC(O)=O)CCC(O)=O)CCC(=O)NCCN(CCC(O)=O)CCC(O)=O)CCC(=O)NCCN(CCC(O)=O)CCC(O)=O)CCC(O)=O
